# Supplementary material
Source: PubMed Central journal article supplement (PMC7738422)
Supplement: NIHMS1619220-supplement-Supplementary_material_1.pdf [file NIHMS1619220-supplement-Supplementary_material_1.pdf]

**Warner and Mendez, “How Much of the Future Mortality Toll of Smoking Can Be Avoided?”**

**Supplemental material: Description of the structure of the model**

**Model specification:**

**Definition of dynamic (time-dependent) variables:**

$P(a, t)$  = US population of age  $a$  in year  $t$

$N(a, t)$  = Population of never – smokers of age  $a$  in year  $t$

$F(a, t, q)$  = Population of former – smokers of age  $a$ , in year  $t$ , that quit  $q$  years ago

$C(a, t)$  = Population of current – smokers of age  $a$  in year  $t$

$\pi_N(a, t)$  = Prevalence of never – smokers of age  $a$  in year  $t$

$\pi'_N(t)$  = Adult prevalence of never – smokers in year  $t$

$\pi_F(a, t)$  = Prevalence of former – smokers of age  $a$  in year  $t$

$\pi'_F(t)$  = Adult prevalence of former – smokers in year  $t$

$\pi_C(a, t)$  = Prevalence of current – smokers of age  $a$  in year  $t$

$\pi'_C(t)$  = Adult prevalence of current – smokers in year  $t$

$D(t)$  = Total deaths in year  $t$

**Definition of Non-dynamic variables and parameters:**

$\mu(a)$  = Overall death rate for individuals of age  $a$

$\mu_N(a)$  = Death rate among non – smokers of age  $a$

$\mu_F(a, q)$  = Death rate among former – smokers of age  $a$  who quit  $q$  years ago

$\mu_C(a)$  = Death rate among current – smokers of age  $a$

$\rho(a)$  = Overall smoking quit rate for individuals of age  $a$

$I$  = Smoking initiation age

$\gamma$  = Overall smoking initiation rate

$RR(a, q)$  = Relative risk of death for a former smoker of age  $a$  who quit  $q$  years ago

$q = 0$  implies a current – smoker

The function  $RR(a, q)$  is derived in a monograph found [here](#).<sup>1</sup>

**Dynamic (time-dependent) relationships:**

$$N(0, t) = P(0, t)$$

$$N(a, t) = N(a - 1, t - 1) \times (1 - \mu_N(a)) \text{ for } a \neq I$$

$$N(a, t) = N(a - 1, t - 1) \times (1 - \mu_N(a)) \times (1 - \gamma) \text{ for } a = I$$

$$F(a, t, q) = 0 \text{ for } a - q \leq I$$

$$F(a, t, 1) = C(a - 1, t - 1) \times (1 - \mu_C(a - 1)) \times \rho(a - 1) \text{ for } a - q > I$$

$$F(a, t, q) = F(a - 1, t - 1, q - 1) \times (1 - \mu_F(a - 1, q - 1)) \text{ for } a - q > I \text{ and } q > 1$$

$$C(a, t) = 0 \text{ for } a < I$$

$$C(a, t) = \gamma \times N(a - 1, t - 1) \times (1 - \mu_N(a - 1)) \text{ for } a = I$$

$$C(a, t) = C(a - 1, t - 1) \times (1 - \mu_C(a - 1)) \times (1 - \rho(a - 1)) \text{ for } a > I$$

$$P(a, t) = N(a, t) + \sum_{q=1}^{q=30+} F(a, t, q) + C(a, t)$$

$$\pi_N(a, t) = \frac{N(a, t)}{P(a, t)}$$

$$\pi'_N(t) = \frac{\sum_{a=18}^{a=100} N(a, t)}{\sum_{a=18}^{a=100} P(a, t)}$$

$$\pi_F(a, t) = \frac{\sum_{q=1}^{q=30+} F(a, t, q)}{P(a, t)}$$

$$\pi'_F(t) = \frac{\sum_{a=18}^{a=100} \sum_{q=1}^{q=30+} F(a, t, q)}{\sum_{a=18}^{a=100} P(a, t)}$$

$$\pi_C(a, t) = \frac{C(a, t)}{P(a, t)}$$

$$\pi'_C(t) = \frac{\sum_{a=18}^{a=100} C(a, t)}{\sum_{a=18}^{a=100} P(a, t)}$$

$$D(t) = \sum_{a=0}^{a=100} N(a, t) \times \mu_N(a) + \sum_{a=0}^{a=100} \sum_{q=1}^{q=30+} F(a, t, q) \times \mu_F(a, q) + \sum_{a=0}^{a=100} C(a, t) \times \mu_C(a)$$

### Static (time-independent) relationships:

Expressions related to mortality risks and derivation of death rates for current-, former- and never-smokers given overall death rates  $\mu(a)$  in 2017.

$$\mu_F(a, q) = \mu_N(a) \times RR(a, q)$$

$$\mu_C(a) = \mu_N(a) \times RR(a, 0)$$

$$\mu(a) = \mu_N(a) \times \pi_N(a, 2017) + \left( \sum_{q=1}^{q=30+} \mu_N(a) \times RR(a, q) \times \pi_F(a, 2017, q) \right) + \mu_N(a) \times RR(a, 0) \times \pi_C(a, 2017) \rightarrow$$

$$\mu_N(a) = \frac{\mu(a)}{\pi_N(a, 2017) + \sum_{q=1}^{q=30+} (RR(a, q) \times \pi_F(a, 2017, q)) + RR(a, 0) \times \pi_C(a, 2017)}$$

### Model description:

The model projects the US population, distinguished by age (0 to 100) and smoking status, over the period 2017-2100. Smoking status is categorized by current smokers, never smokers, and former smokers. The latter group is further divided by years-since-quit (year-quits.) The model tracks former smokers from 1 to 30 year-quits.

Each year, for the next 83 years (2018 to 2100) and for every year of age (from 0 to 100), the model follows the number of individuals in each category. Each simulated year the model

introduces a birth cohort obtained from the U.S. Census Bureau projections for the period 2018-2100 and ages the population using age- and smoking status- specific death rates. Individuals younger than 18 are considered non-smokers. At age 18, a proportion of individuals become smokers and the rest remain non-smokers for their remaining life span. After age 18, smokers are given the chance to quit smoking. Those who quit become former smokers and are tracked by age and year-quits.

The model incorporates age-specific quit rates, although, for the current analysis we used the overall quit rate for the US population estimated in a previous study.<sup>2</sup> Age-specific death rates were computed for current-, never-, and former-smokers, (the latter differentiated additionally by year-quits) employing smoking relative risks derived from the Cancer Prevention Study II (CPS II) data and the procedure described earlier.<sup>1</sup> 2017 background death rates for the general population were obtained from the National Vital Statistics Reports.<sup>3</sup> 2017 US population estimates were obtained from the US Census Bureau.<sup>4</sup> Initial (2017) estimates for age-specific smoking prevalence were obtained from the National Health Interview Survey (NHIS).<sup>5</sup> The status-quo initiation rate for the general population was taken to be 7.8%, the 2018 NHIS smoking prevalence among 18-24 year-olds.<sup>6</sup> Cumulative life-years-saved (LYS) or -lost (LYL) between two scenarios are computed by subtracting the cumulative populations up to a certain age of the respective scenarios.

#### References:

1. Mendez D, Warner KE, Alshanteety O. The relative risk of death for former smokers: the influence of age and years-quit. Research Monograph. 2004. Available at: <https://drive.google.com/file/d/15WP->

gwawrFjW9YI6v2o8RLPgwl5X8uAQ/view?usp=sharing. Accessed March 5, 2020.

Technical Appendix to: Warner KE, Mendez D, and Smith DG. The financial implications of coverage of smoking cessation treatment by managed care organizations. *Inquiry*. 2004;41(1):57-69.

2. Mendez D, Tam J, Giovino GA, Tsodikov A, Warner KE. Has smoking cessation increased? *Nicotine Tob Res*. 2017;19(12):1418–1424
3. Arias E, Xu J. United States Life Tables, 2017. *National Vital Statistics Reports*, 2019;68:7. Available at: [https://www.cdc.gov/nchs/data/nvsr/nvsr68/nvsr68\\_07-508.pdf](https://www.cdc.gov/nchs/data/nvsr/nvsr68/nvsr68_07-508.pdf). Accessed March 5, 2020.
4. US Census Bureau. Age and Sex Composition in the United States: 2017. Available at: <https://www.census.gov/data/tables/2017/demo/age-and-sex/2017-age-sex-composition.html>. Accessed March 5, 2020.
5. Wang TW, Asman K, Gentzke AS, et al. Tobacco Product Use Among Adults — United States, 2017. *MMWR Morb Mortal Wkly Rep* 2018;67:1225–1232. DOI: <http://dx.doi.org/10.15585/mmwr.mm6744a2>. Accessed March 5, 2020.
6. Creamer MR, Wang TW, Babb S, et al. Tobacco Product Use and Cessation Indicators Among Adults – United States, 2018. *MMWR Morb Mortal Wkly Rep* 2019;68:1013-1019. DOI: <http://dx.doi.org/10.15585/mmwr.mm6845a2>. Accessed March 5, 2020.
