# Supplementary material
Source: PubMed Central journal article supplement (PMC7738422)
Supplement: NIHMS1619220-supplement-Supplementary_material_2.pdf [file NIHMS1619220-supplement-Supplementary_material_2.pdf]

Supplementary Table S-1: Life-years lost (LYL) due to smoking and Maximum Potential Reduction in Premature Mortality (MPRPM)

| Year | Cumulative person-years (millions) |                                |                            | Life-years lost (LYL) due to smoking (millions) |                                            |                       | MPRPM as % of LYL due to smoking under status-quo scenario (7) = (6) / (4) |
|------|------------------------------------|--------------------------------|----------------------------|-------------------------------------------------|--------------------------------------------|-----------------------|----------------------------------------------------------------------------|
|      | Status-quo scenario (1)            | No-future-smoking scenario (2) | Never-smoking scenario (3) | Status-quo scenario (4) = (3) - (1)             | No-future-smoking scenario (5) = (3) - (2) | MPRPM (6) = (4) - (5) |                                                                            |
| 2020 | 1,017                              | 1,017                          | 1,020                      | 3.5                                             | 3.4                                        | 0.1                   | 1.80%                                                                      |
| 2021 | 1,275                              | 1,275                          | 1,280                      | 5.6                                             | 5.5                                        | 0.1                   | 2.54%                                                                      |
| 2022 | 1,533                              | 1,534                          | 1,542                      | 8.2                                             | 8.0                                        | 0.3                   | 3.27%                                                                      |
| 2023 | 1,793                              | 1,794                          | 1,805                      | 11.3                                            | 10.8                                       | 0.4                   | 3.97%                                                                      |
| 2024 | 2,055                              | 2,055                          | 2,069                      | 14.7                                            | 14.0                                       | 0.7                   | 4.68%                                                                      |
| 2025 | 2,317                              | 2,318                          | 2,335                      | 18.5                                            | 17.5                                       | 1.0                   | 5.38%                                                                      |
| 2026 | 2,580                              | 2,582                          | 2,603                      | 22.6                                            | 21.3                                       | 1.4                   | 6.08%                                                                      |
| 2027 | 2,845                              | 2,847                          | 2,872                      | 27.1                                            | 25.3                                       | 1.8                   | 6.79%                                                                      |
| 2028 | 3,110                              | 3,112                          | 3,142                      | 31.8                                            | 29.4                                       | 2.4                   | 7.49%                                                                      |
| 2029 | 3,376                              | 3,379                          | 3,413                      | 36.8                                            | 33.8                                       | 3.0                   | 8.20%                                                                      |
| 2030 | 3,642                              | 3,646                          | 3,684                      | 42.1                                            | 38.3                                       | 3.8                   | 8.91%                                                                      |
| 2031 | 3,910                              | 3,914                          | 3,957                      | 47.6                                            | 43.0                                       | 4.6                   | 9.63%                                                                      |
| 2032 | 4,177                              | 4,183                          | 4,231                      | 53.3                                            | 47.8                                       | 5.5                   | 10.34%                                                                     |
| 2033 | 4,446                              | 4,452                          | 4,505                      | 59.1                                            | 52.6                                       | 6.5                   | 11.06%                                                                     |
| 2034 | 4,714                              | 4,722                          | 4,779                      | 65.2                                            | 57.5                                       | 7.7                   | 11.78%                                                                     |
| 2035 | 4,983                              | 4,992                          | 5,054                      | 71.3                                            | 62.4                                       | 8.9                   | 12.50%                                                                     |
| 2036 | 5,252                              | 5,262                          | 5,330                      | 77.6                                            | 67.3                                       | 10.3                  | 13.21%                                                                     |
| 2037 | 5,522                              | 5,533                          | 5,606                      | 84.0                                            | 72.3                                       | 11.7                  | 13.93%                                                                     |
| 2038 | 5,791                              | 5,805                          | 5,882                      | 90.4                                            | 77.2                                       | 13.2                  | 14.65%                                                                     |
| 2039 | 6,061                              | 6,076                          | 6,158                      | 96.9                                            | 82.0                                       | 14.9                  | 15.36%                                                                     |
| 2040 | 6,331                              | 6,348                          | 6,435                      | 103.4                                           | 86.8                                       | 16.6                  | 16.07%                                                                     |

| Year | Cumulative person-years (millions) |                   |               | Life-years lost (LYL) due to smoking (millions) |                   |       | MPRPM as % of LYL due to smoking under |
|------|------------------------------------|-------------------|---------------|-------------------------------------------------|-------------------|-------|----------------------------------------|
|      | Status-quo scenario                | No-future-smoking | Never-smoking | Status-quo scenario                             | No-future-smoking | MPRPM |                                        |
| 2041 | 6,602                              | 6,620             | 6,712         | 110.0                                           | 91.5              | 18.5  | 16.78%                                 |
| 2042 | 6,872                              | 6,892             | 6,988         | 116.5                                           | 96.1              | 20.4  | 17.49%                                 |
| 2043 | 7,142                              | 7,165             | 7,265         | 123.0                                           | 100.6             | 22.4  | 18.19%                                 |
| 2044 | 7,412                              | 7,437             | 7,542         | 129.5                                           | 105.0             | 24.5  | 18.89%                                 |
| 2045 | 7,683                              | 7,709             | 7,819         | 135.9                                           | 109.3             | 26.6  | 19.58%                                 |
| 2046 | 7,953                              | 7,982             | 8,095         | 142.3                                           | 113.4             | 28.8  | 20.27%                                 |
| 2047 | 8,223                              | 8,254             | 8,371         | 148.5                                           | 117.4             | 31.1  | 20.94%                                 |
| 2048 | 8,493                              | 8,526             | 8,647         | 154.7                                           | 121.3             | 33.4  | 21.61%                                 |
| 2049 | 8,762                              | 8,798             | 8,923         | 160.8                                           | 125.0             | 35.8  | 22.27%                                 |
| 2050 | 9,032                              | 9,070             | 9,199         | 166.7                                           | 128.5             | 38.2  | 22.91%                                 |
| 2051 | 9,301                              | 9,342             | 9,474         | 172.5                                           | 131.9             | 40.6  | 23.53%                                 |
| 2052 | 9,571                              | 9,614             | 9,749         | 178.2                                           | 135.2             | 43.0  | 24.13%                                 |
| 2053 | 9,840                              | 9,885             | 10,024        | 183.7                                           | 138.3             | 45.4  | 24.71%                                 |
| 2054 | 10,109                             | 10,157            | 10,298        | 189.0                                           | 141.2             | 47.8  | 25.27%                                 |
| 2055 | 10,378                             | 10,428            | 10,572        | 194.2                                           | 144.1             | 50.1  | 25.81%                                 |
| 2056 | 10,647                             | 10,699            | 10,846        | 199.2                                           | 146.7             | 52.4  | 26.32%                                 |
| 2057 | 10,916                             | 10,970            | 11,120        | 204.0                                           | 149.3             | 54.7  | 26.82%                                 |
| 2058 | 11,184                             | 11,241            | 11,393        | 208.6                                           | 151.7             | 56.9  | 27.29%                                 |
| 2059 | 11,453                             | 11,512            | 11,666        | 213.1                                           | 154.0             | 59.1  | 27.74%                                 |
| 2060 | 11,722                             | 11,783            | 11,939        | 217.4                                           | 156.2             | 61.3  | 28.17%                                 |
| 2061 | 11,990                             | 12,054            | 12,212        | 221.5                                           | 158.2             | 63.3  | 28.59%                                 |
| 2062 | 12,259                             | 12,324            | 12,484        | 225.5                                           | 160.2             | 65.4  | 28.98%                                 |
| 2063 | 12,528                             | 12,595            | 12,757        | 229.4                                           | 162.1             | 67.3  | 29.36%                                 |
| 2064 | 12,796                             | 12,865            | 13,029        | 233.1                                           | 163.8             | 69.3  | 29.71%                                 |
| 2065 | 13,065                             | 13,136            | 13,302        | 236.7                                           | 165.6             | 71.1  | 30.05%                                 |
| 2066 | 13,334                             | 13,407            | 13,574        | 240.2                                           | 167.2             | 72.9  | 30.37%                                 |
| 2067 | 13,602                             | 13,677            | 13,846        | 243.5                                           | 168.8             | 74.7  | 30.67%                                 |
| 2068 | 13,871                             | 13,948            | 14,118        | 246.8                                           | 170.4             | 76.4  | 30.96%                                 |
| 2069 | 14,140                             | 14,218            | 14,390        | 250.0                                           | 171.9             | 78.0  | 31.22%                                 |

| Year | Cumulative person-years (millions) |                   |               | Life-years lost (LYL) due to smoking (millions) |                   |       | MPRPM as % of LYL due to smoking under |
|------|------------------------------------|-------------------|---------------|-------------------------------------------------|-------------------|-------|----------------------------------------|
|      | Status-quo scenario                | No-future-smoking | Never-smoking | Status-quo scenario                             | No-future-smoking | MPRPM |                                        |
| 2070 | 14,409                             | 14,489            | 14,662        | 253.0                                           | 173.4             | 79.6  | 31.47%                                 |
| 2071 | 14,678                             | 14,759            | 14,934        | 256.0                                           | 174.8             | 81.2  | 31.71%                                 |
| 2072 | 14,947                             | 15,030            | 15,206        | 258.9                                           | 176.2             | 82.6  | 31.93%                                 |
| 2073 | 15,216                             | 15,301            | 15,478        | 261.6                                           | 177.6             | 84.1  | 32.13%                                 |
| 2074 | 15,486                             | 15,571            | 15,750        | 264.3                                           | 178.8             | 85.4  | 32.33%                                 |
| 2075 | 15,755                             | 15,842            | 16,022        | 266.8                                           | 180.1             | 86.8  | 32.52%                                 |
| 2076 | 16,025                             | 16,113            | 16,294        | 269.3                                           | 181.2             | 88.0  | 32.69%                                 |
| 2077 | 16,294                             | 16,383            | 16,566        | 271.6                                           | 182.4             | 89.3  | 32.86%                                 |
| 2078 | 16,564                             | 16,654            | 16,838        | 273.9                                           | 183.4             | 90.4  | 33.02%                                 |
| 2079 | 16,833                             | 16,925            | 17,109        | 276.0                                           | 184.4             | 91.6  | 33.18%                                 |
| 2080 | 17,103                             | 17,196            | 17,381        | 278.0                                           | 185.3             | 92.7  | 33.34%                                 |
| 2081 | 17,373                             | 17,467            | 17,653        | 279.9                                           | 186.2             | 93.8  | 33.49%                                 |
| 2082 | 17,643                             | 17,738            | 17,925        | 281.8                                           | 187.0             | 94.8  | 33.65%                                 |
| 2083 | 17,914                             | 18,009            | 18,197        | 283.5                                           | 187.7             | 95.8  | 33.80%                                 |
| 2084 | 18,184                             | 18,281            | 18,469        | 285.1                                           | 188.3             | 96.8  | 33.96%                                 |
| 2085 | 18,455                             | 18,552            | 18,741        | 286.7                                           | 188.9             | 97.8  | 34.12%                                 |
| 2086 | 18,725                             | 18,824            | 19,014        | 288.2                                           | 189.4             | 98.8  | 34.28%                                 |
| 2087 | 18,996                             | 19,096            | 19,286        | 289.6                                           | 189.8             | 99.8  | 34.45%                                 |
| 2088 | 19,268                             | 19,368            | 19,559        | 291.0                                           | 190.2             | 100.7 | 34.62%                                 |
| 2089 | 19,539                             | 19,641            | 19,832        | 292.3                                           | 190.6             | 101.7 | 34.80%                                 |
| 2090 | 19,811                             | 19,914            | 20,105        | 293.6                                           | 190.9             | 102.7 | 34.98%                                 |
| 2091 | 20,083                             | 20,187            | 20,378        | 294.8                                           | 191.1             | 103.7 | 35.17%                                 |
| 2092 | 20,356                             | 20,460            | 20,652        | 296.0                                           | 191.3             | 104.7 | 35.37%                                 |
| 2093 | 20,629                             | 20,734            | 20,926        | 297.2                                           | 191.5             | 105.7 | 35.57%                                 |
| 2094 | 20,902                             | 21,009            | 21,200        | 298.4                                           | 191.6             | 106.8 | 35.78%                                 |
| 2095 | 21,175                             | 21,283            | 21,475        | 299.5                                           | 191.7             | 107.8 | 35.99%                                 |
| 2096 | 21,449                             | 21,558            | 21,750        | 300.6                                           | 191.8             | 108.9 | 36.21%                                 |
| 2097 | 21,724                             | 21,834            | 22,026        | 301.7                                           | 191.8             | 109.9 | 36.43%                                 |
| 2098 | 21,999                             | 22,110            | 22,302        | 302.8                                           | 191.8             | 111.0 | 36.66%                                 |

| Year | Cumulative person-years (millions) |                   |               | Life-years lost (LYL) due to smoking (millions) |                   |       | MPRPM as % of LYL due to smoking under |
|------|------------------------------------|-------------------|---------------|-------------------------------------------------|-------------------|-------|----------------------------------------|
|      | Status-quo scenario                | No-future-smoking | Never-smoking | Status-quo scenario                             | No-future-smoking | MPRPM |                                        |
| 2099 | 22,274                             | 22,387            | 22,578        | 303.9                                           | 191.8             | 112.1 | 36.89%                                 |
| 2100 | 22,550                             | 22,664            | 22,855        | 305.0                                           | 191.8             | 113.2 | 37.12%                                 |
